# Supplementary material
Source: publisher site journal article supplement (https://www.dovepress.com/article/323077)
Supplement: Supplementary file 1 [file get_supplementary_file.php]

## Supplementary materials

Drug repurposing: Deferasirox inhibits the anti-apoptotic activity of Mcl-1

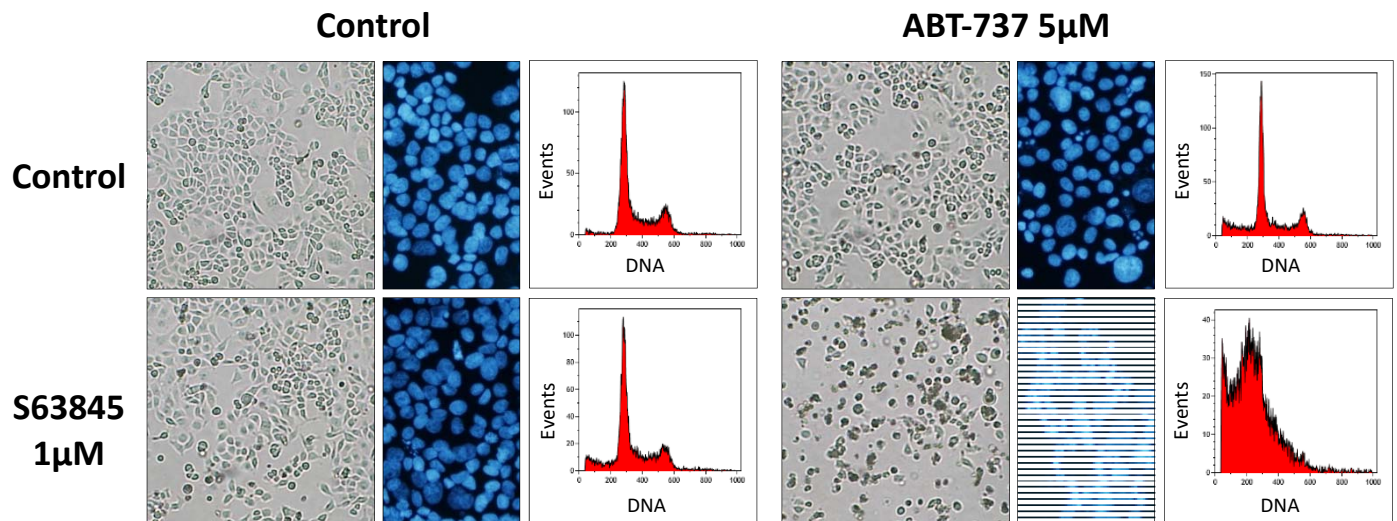

**Figure S1.** Effect of S63845 in combination with ABT-737 on apoptosis on IGROV1-R10 cell line. Twenty-four hours after seeding, IGROV1-R10 ovarian cancer cells were exposed to 1 $\mu$ M S63845 for 24 h in absence or presence of 5 $\mu$ M ABT-737 and effects on cellular morphology were analyzed

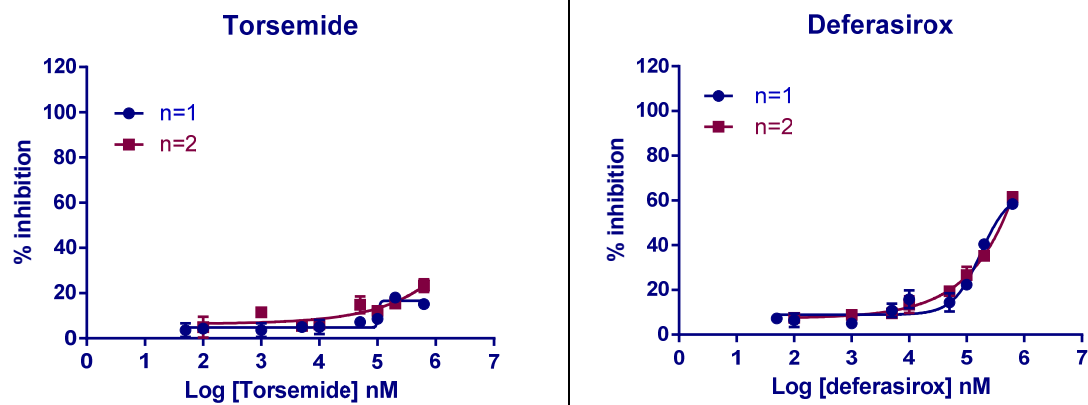

**Figure S2.** Competitive inhibition binding curves of Deferasirox and torsemide. The experiments were duplicated; n is the assay number

A.

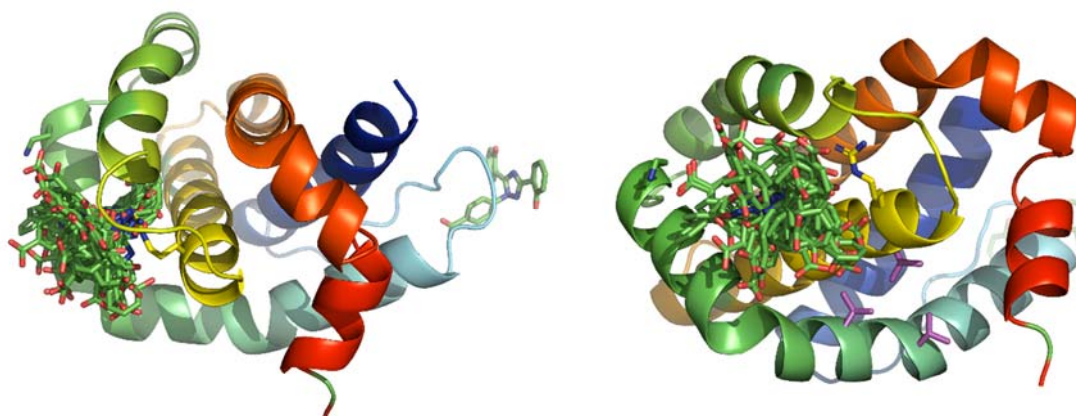

B.

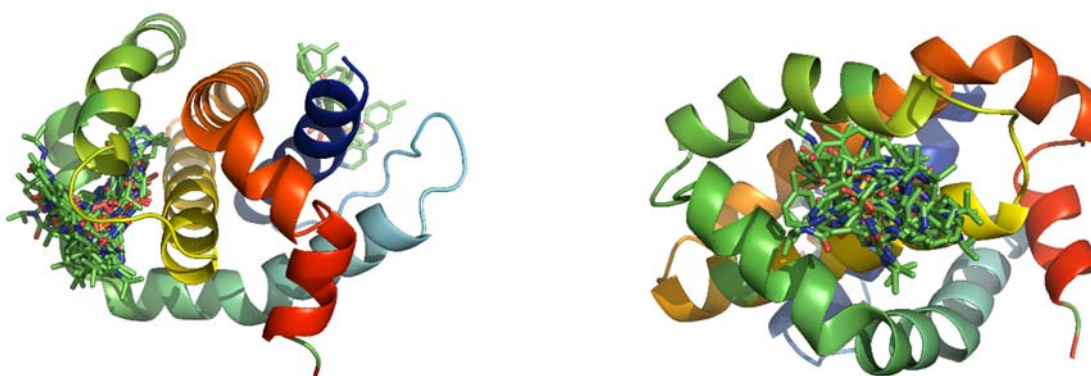

**Figure S3.** Generated docking binding poses of Deferasirox in Mcl-1 (A) and of Toremide (B) by blind docking. The residues of P4 pocket perturbed during NMR study are colored in pink

### Torseptide RMSD

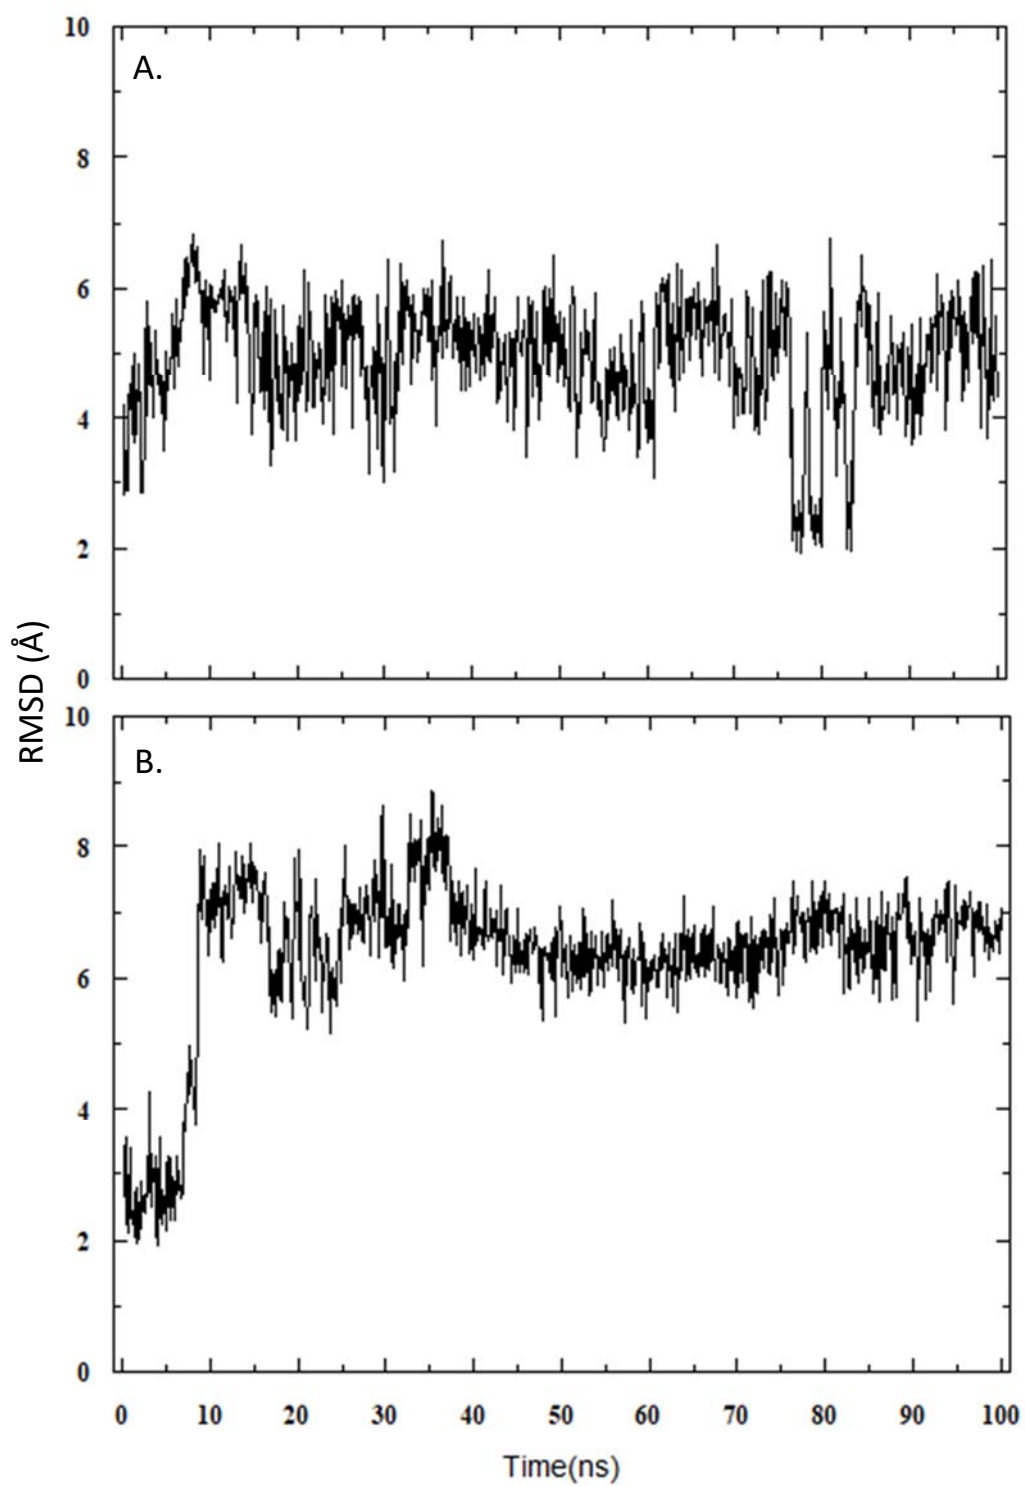

**Figure S4A.** Torsemide RMSD evolution. A. Pose 1; B. Pose 2

### Torseptide/Mcl-1 interaction energy

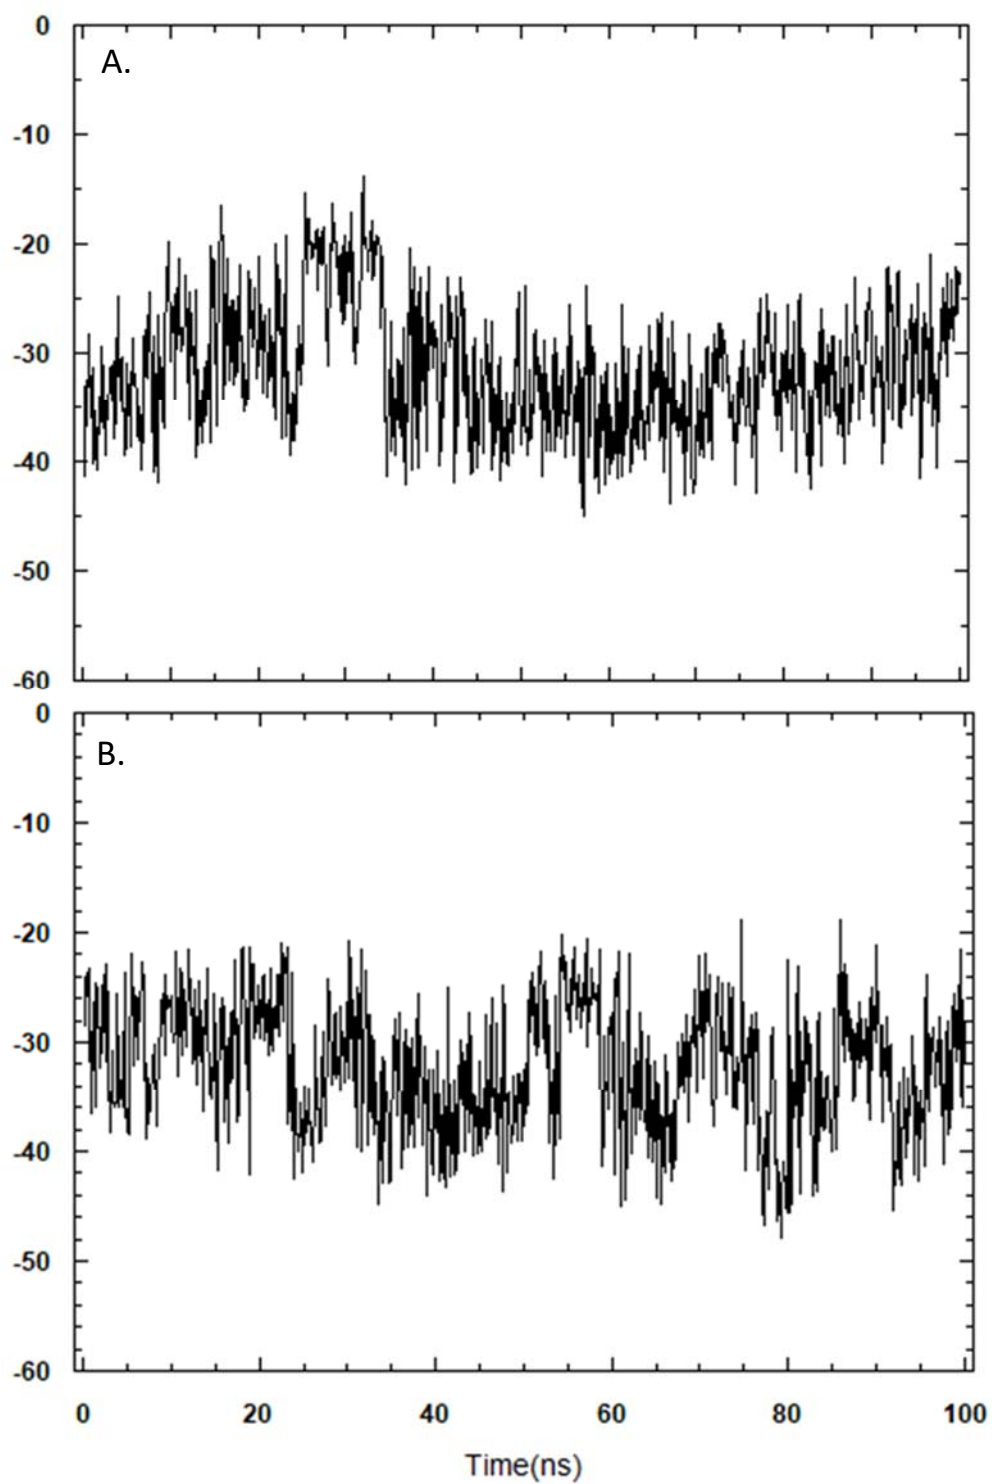

**Figure S4B.** Torseptide/Mcl-1 interaction energy: A. Pose 1; B. Pose 2

**Interaction energy statistics:** mean  $\pm$  sd

**Pose 1 :**  $-31.5 \pm 5.7$  kcal/mol

**Pose 2 :**  $-32.3 \pm 5.7$  kcal/mol

### Deferasirox RMSD

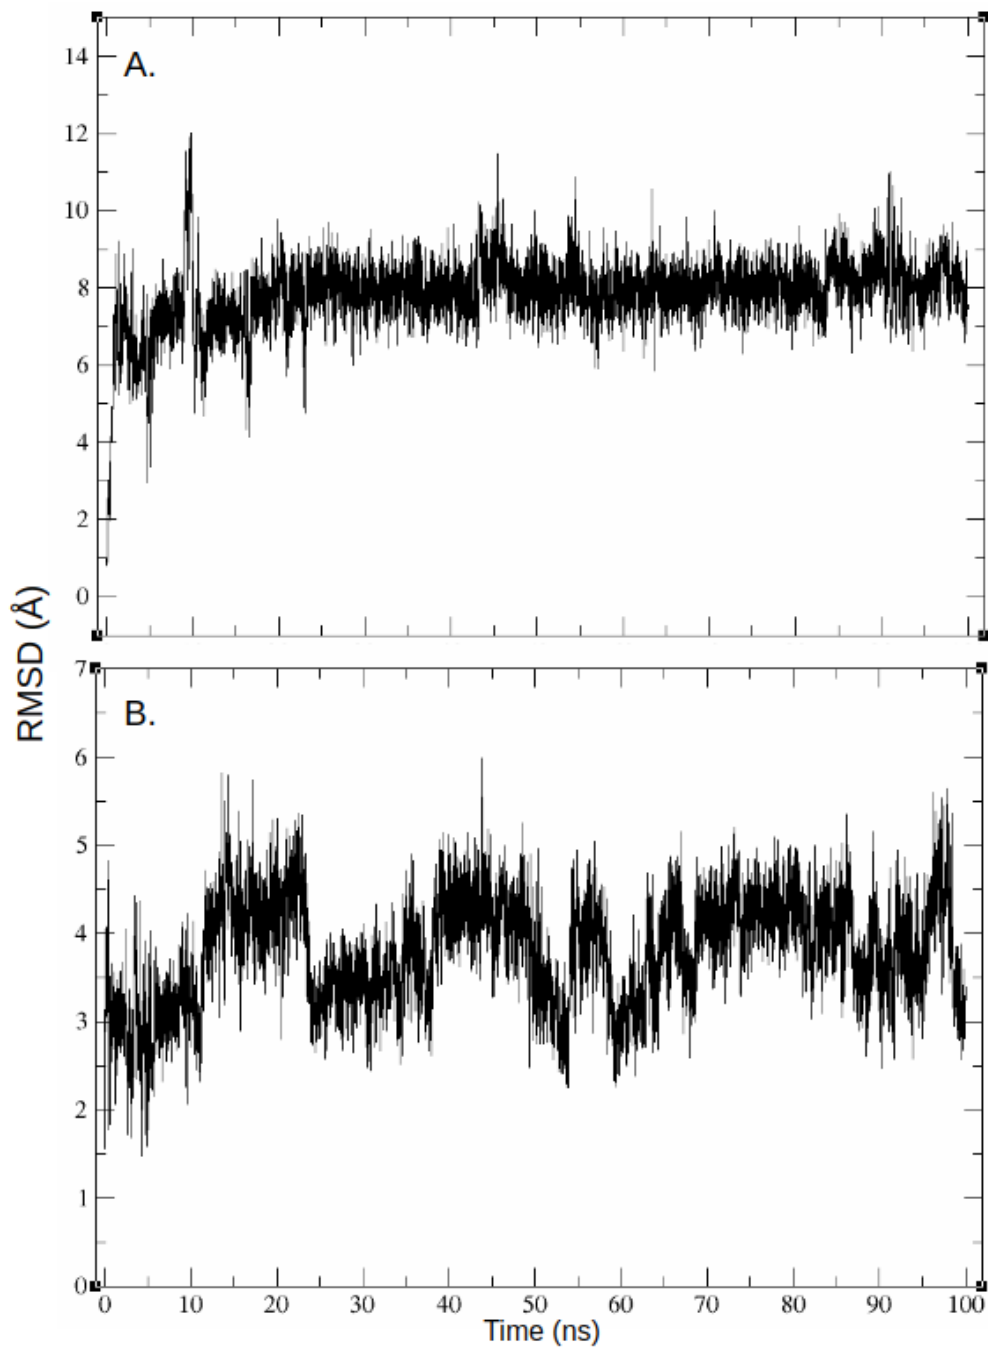

**Figure S5A.** Deferasirox RMSD evolution. A. Pose 1; B. Pose 2

### Defrasirox/Mcl-1 interaction energy

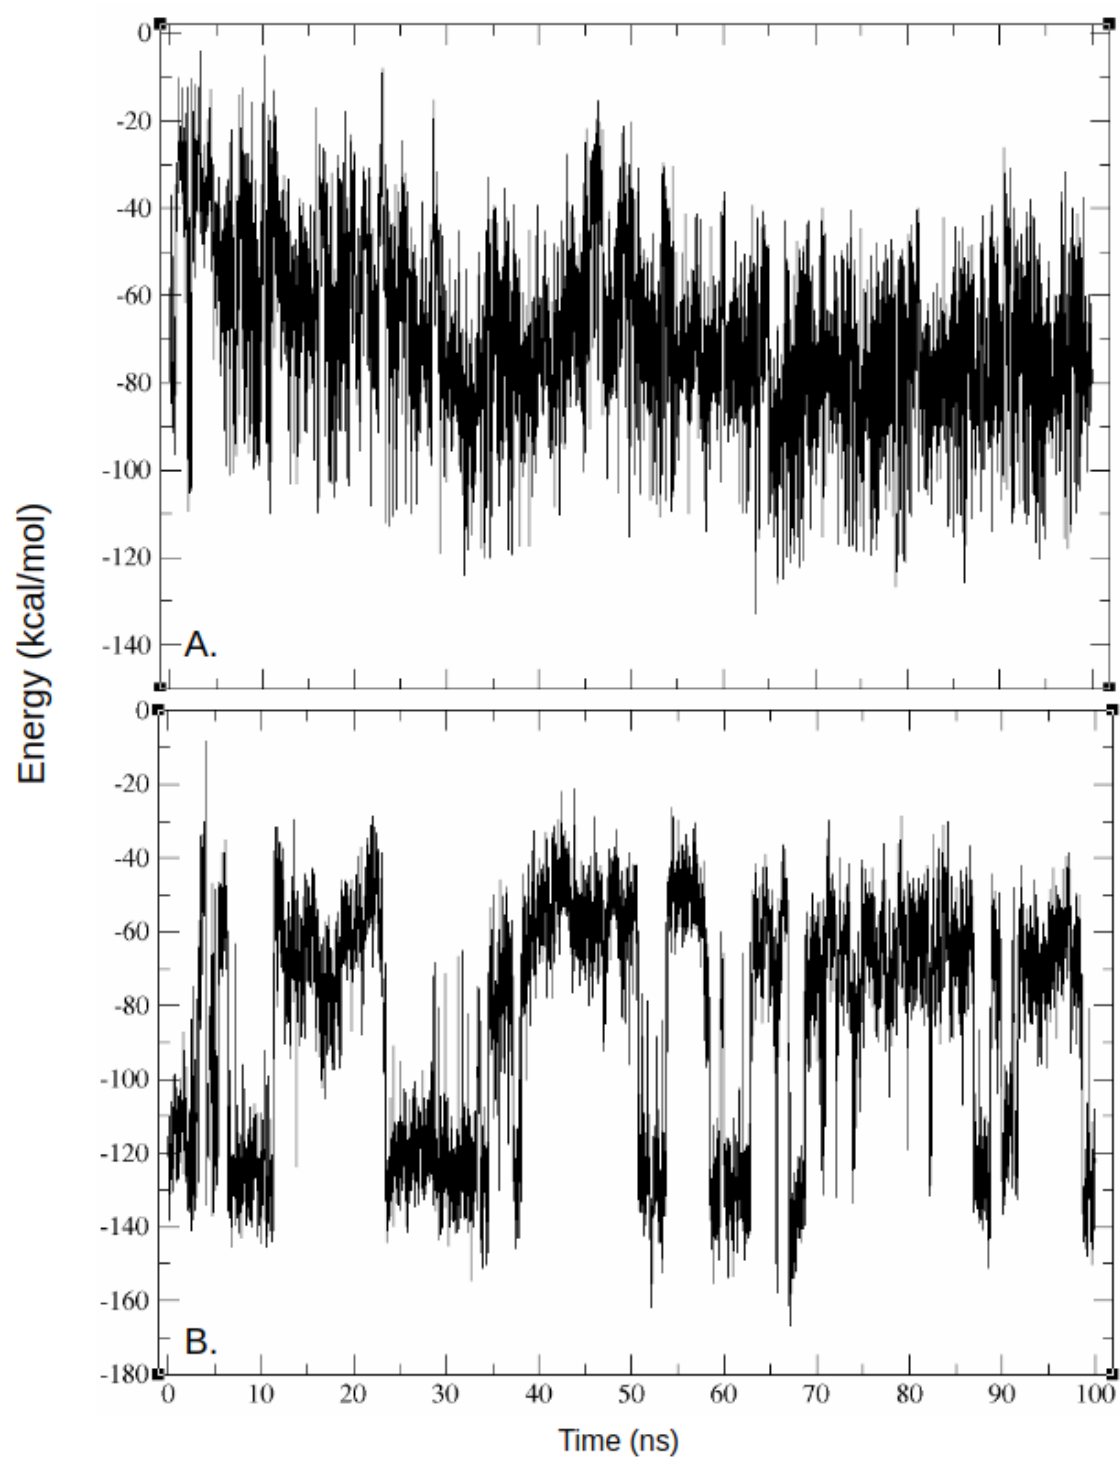

**Figure S5B.** Defrasirox/Mcl-1 interaction energy: A. Pose 1; B. Pose 2

**Interaction energy statistics:** mean  $\pm$  sd

Pose 1 :  $-68.2 \pm 19.1$  kcal/mol

Pose 2 :  $-84.6 \pm 31.8$  kcal/mol  $\Rightarrow$  Pose 2 is more favorable.

### Deferasirox intramolecular H-bonds

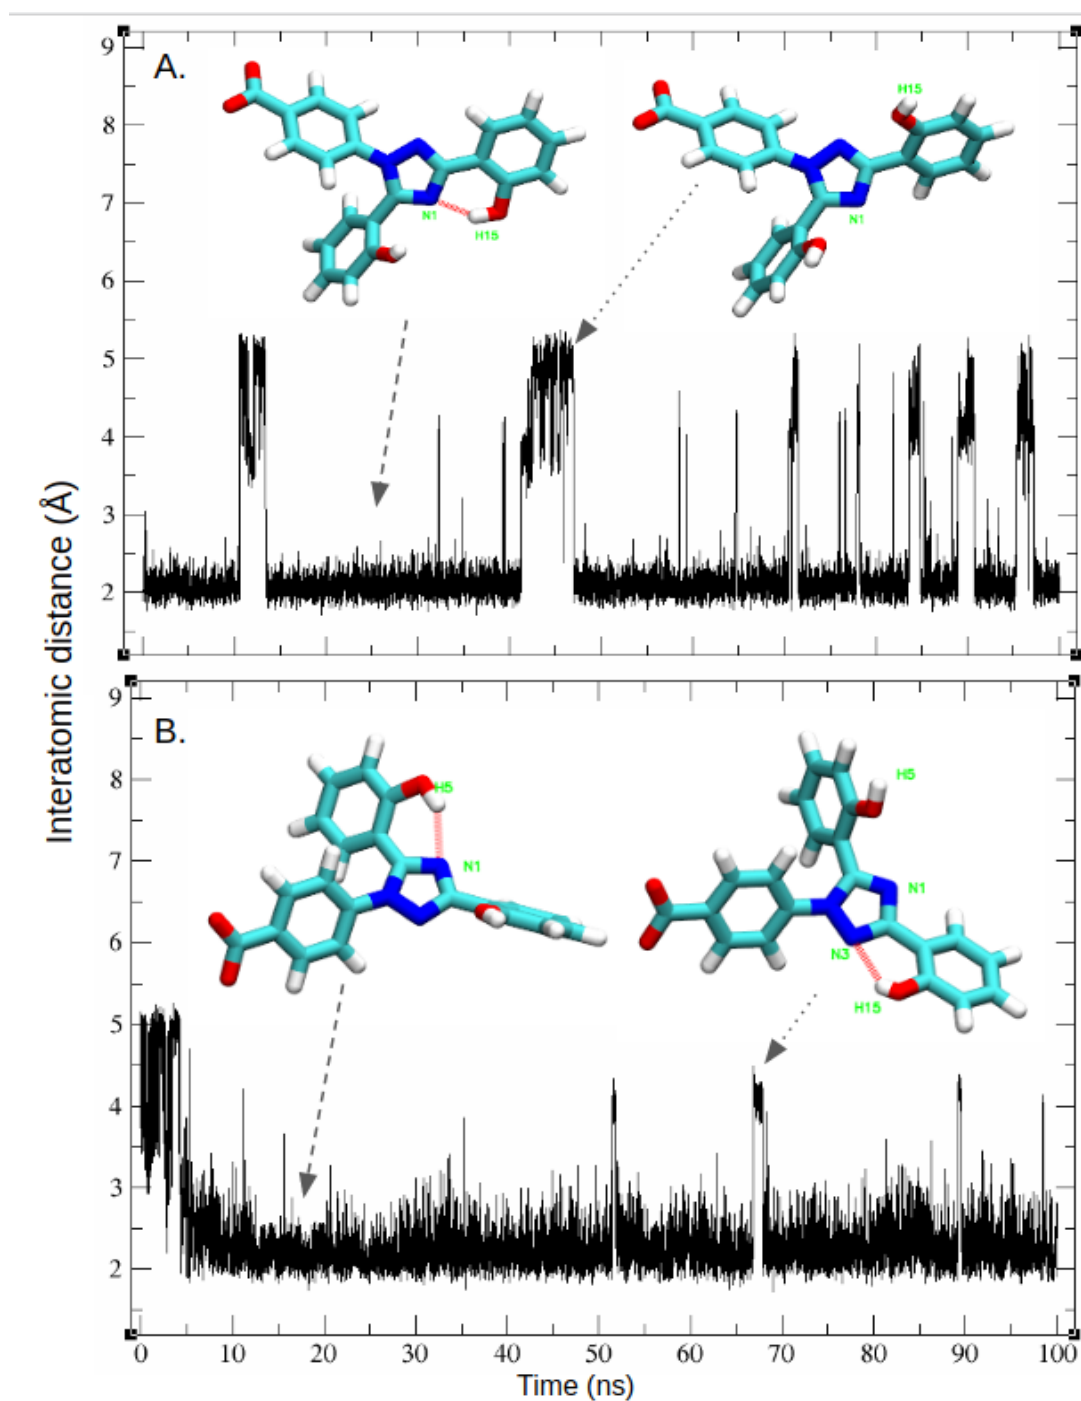

**Figure S6.** Deferasirox interatomic distance analysis. A. Pose 1: distance (N1-H15) and H-bond evolution. B. Pose 2: distance (N1-H5) and H-bond evolution

The interatomic distance analysis shows as well that the pose 2 is favored: the intramolecular H-bonds are more persistent.
